# Supplementary material for: Detection of an Earth-sized exoplanet orbiting the nearby ultracool dwarf star SPECULOOS-3
Source: Springer Nature journal article supplement (doi:10.1038/s41550-024-02271-2), 2024-05-15
Supplement: 41550_2024_2271_MOESM1_ESM.pdf [file 41550_2024_2271_MOESM1_ESM.pdf]

# Detection of an Earth-sized exoplanet orbiting the nearby ultracool dwarf star SPECULOOS-3

---

In the format provided by the authors and unedited

---

# Detection of an Earth-sized exoplanet orbiting the nearby ultracool dwarf star SPECULOOS-3: Supplementary Information

## Source Data Files Inventory

- Figure 1: Gillon\_SPECULOOS3\_SourceData\_Fig1.csv
- Figure 2: Gillon\_SPECULOOS3\_SourceData\_Fig2.csv
- Figure 3: Gillon\_SPECULOOS3\_SourceData\_Fig3.csv
- Figure 4: Gillon\_SPECULOOS3\_SourceData\_Fig4.csv
- Figure 5: Gillon\_SPECULOOS3\_SourceData\_Fig5.csv
- Extended Data Figure 2: Gillon\_SPECULOOS3\_SourceData\_ED\_Fig2.csv
- Extended Data Figure 3: Gillon\_SPECULOOS3\_SourceData\_ED\_Fig3.csv
- Extended Data Figure 4: Gillon\_SPECULOOS3\_SourceData\_ED\_Fig4.csv

## Data Repository

The ground-based and TESS light curves and the spectra used in this work are publicly available on the following online repository: <https://doi.org/10.5281/zenodo.10821723>

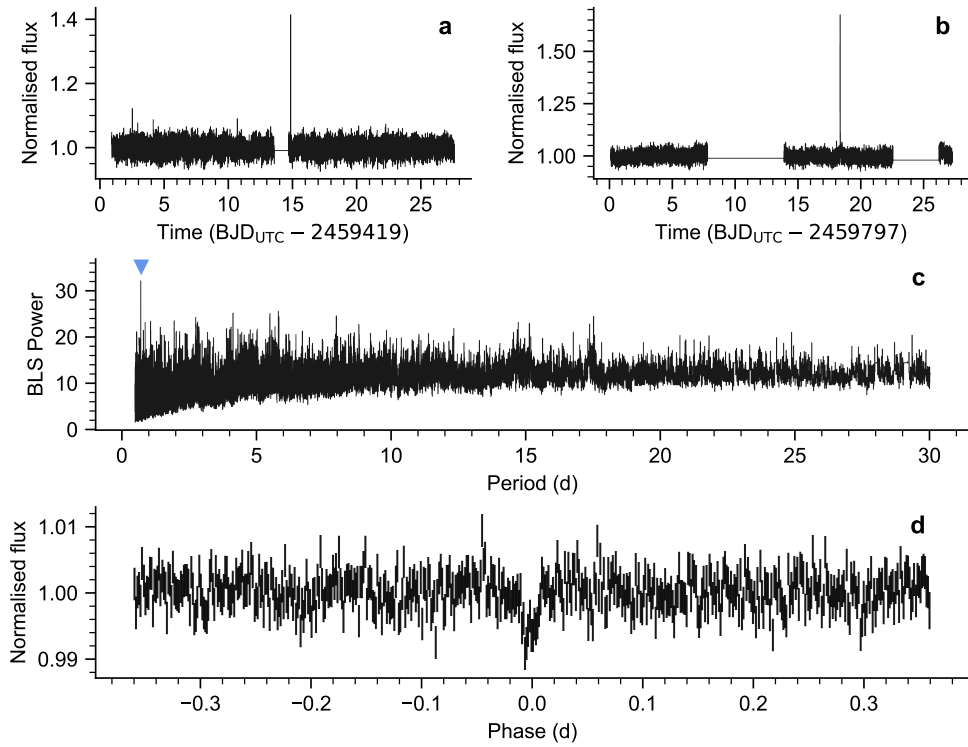

**Supplementary Information Fig. 1 | TESS photometry of SPECULOOS-3.** TESS Sector 41 and 55 light curves of SPECULOOS-3. The Sector 41 (a) and Sector 55 (b) TESS PDCSAP light curves of SPECULOOS-3 clearly show large flares (attributable to SPECULOOS-3) and complex variability (attributable to the nearby star TYC 2691-574-1). (c) After flattening the Sector 41+55 light curve, a box-least-squares analysis reveals a clear peak at the period of SPECULOOS-3b, indicated by a blue triangle here. (d) The transit of SPECULOOS-3b is evident after folding the light curve on this period and binning the data in 2-min bins.

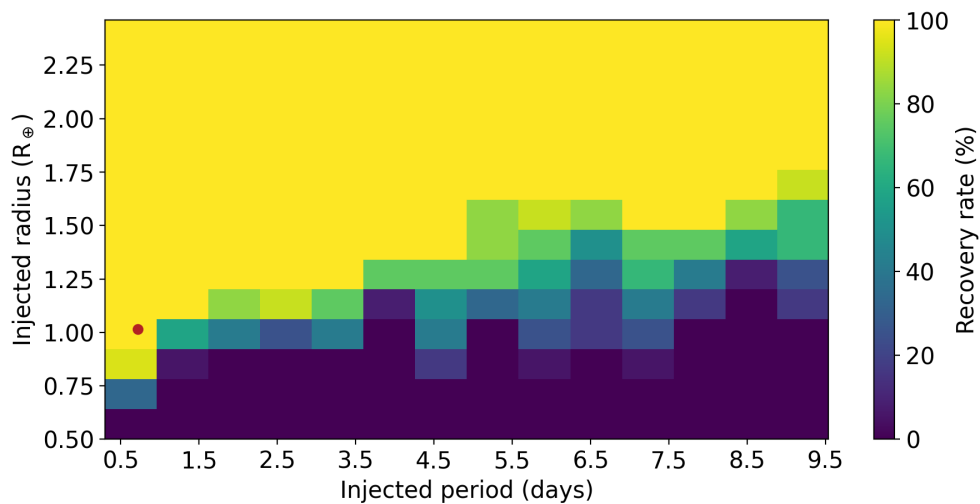

**Supplementary Information Fig. 2 | Detectability of a second planet from TESS data.** The injection-and-recovery experiment was conducted to test the detectability of transiting planets using the flattened TESS data from Sectors 41 and 55. We explored a total of 2700 different scenarios, that is, different combinations of planetary radius, orbital period, and phase. Each pixel represents about evaluated 20 scenarios. Higher recovery rates are presented in yellow and green colors, while lower recovery rates are shown in blue and darker hues. This experiment shows that Earth-size or smaller planets can only be detected for short orbital periods of  $\leq 1$  d in the current dataset. Transiting super-Earths with sizes larger than  $\sim 1.5 R_{\oplus}$  would be easily detected for the complete set of orbital periods explored in this study, allowing us to discard the existence of such planets in the system. The red dot corresponds to SPECULOOS-3 b.

| Filter | Observatory                    | Date        | Baseline                                   | Comment         |
|--------|--------------------------------|-------------|--------------------------------------------|-----------------|
| $I+z$  | SAINT-EX                       | 2021.07.27* | $p(t^2)$                                   |                 |
| $I+z$  | SAINT-EX                       | 2021.07.29* | $p(t^2)$                                   |                 |
| $I+z$  | SNO-Artemis                    | 2022.07.29  | $p(t^3)$                                   | flare           |
| $I+z$  | SNO-Artemis                    | 2023.07.23  | $p(t)$                                     |                 |
| $I+z$  | SNO-Artemis                    | 2023.07.25  | $p(t^2) + p(y) + p(a)$                     |                 |
| $I+z$  | SNO-Artemis                    | 2023.07.27  | $p(t)$                                     | partial transit |
| $I+z$  | SNO-Artemis                    | 2023.07.28  | $p(t^4)$                                   |                 |
| $z'$   | SNO-Artemis                    | 2023.08.02  | $p(t^3)$                                   |                 |
| $z'$   | SNO-Artemis                    | 2023.08.04  | $p(t^4)$                                   |                 |
| $z'$   | SNO-Artemis                    | 2023.08.05  | $p(t^2)$                                   |                 |
| $I+z$  | SNO-Artemis                    | 2023.08.07  | $p(t^3) + p(x^2)$                          |                 |
| $i'$   | SNO-Artemis                    | 2023.08.09  | $p(t^2) + p(x)$                            |                 |
| $I+z$  | SNO-Artemis                    | 2023.08.14  | $p(t^3) + p(x) + p(y^2) + p(f) + p(a)$     |                 |
| $i'$   | SNO-Artemis                    | 2023.08.15  | $p(t^3)$                                   |                 |
| $z'$   | SSO-Callisto                   | 2023.08.22  | $p(t^2) + p(y)$                            |                 |
| $i'$   | SSO-Europa                     | 2023.08.22  | $p(t^2) + p(f)$                            |                 |
| $z'$   | SSO-Callisto                   | 2023.08.27  | $p(t^2) + p(f) + p(a^2)$                   |                 |
| $z'$   | SSO-Io                         | 2023.08.27  | $p(t^4)$                                   |                 |
| $i'$   | SSO-Europa                     | 2023.08.27  | $p(t)$                                     |                 |
| $i'$   | SSO-Ganymede                   | 2023.08.27  | $p(t^2) + p(b)$                            |                 |
| $Ks$   | UKIRT/WFCAM                    | 2023.08.27  | $p(t^3) + p(x^3) + p(y) + p(f^2) + p(b^2)$ |                 |
| $Ks$   | UKIRT/WFCAM                    | 2023.08.30  | $p(t) + p(x) + p(f^2)$                     |                 |
| $I+z$  | SSO-Callisto                   | 2023.09.09  | $p(t) + p(y^2)$                            |                 |
| $i'$   | SNO-Artemis                    | 2023.09.12  | $p(t) + p(x) + p(y^2)$                     |                 |
| $I+z$  | SSO-Io                         | 2023.09.14  | $p(t^2)$                                   |                 |
| $I+z$  | SNO-Artemis                    | 2023.09.15  | $p(t^2)$                                   | flare           |
| $g'$   | MuSCAT3-2m0                    | 2023.09.17  | $p(t^2) + f^2$                             | 15              |
| $I+z$  | SSO-Europa                     | 2023.09.17* | $p(t^4) + p(b)$                            |                 |
| $r'$   | MuSCAT3                        | 2023.09.17  | $p(t^2) + p(f)$                            |                 |
| $i'$   | MuSCAT3                        | 2023.09.17  | $p(t^2) + p(f) + p(a^2) + p(b)$            |                 |
| $z'$   | MuSCAT3                        | 2023.09.17  | $p(t^4) + p(y^2) + p(f^3)$                 |                 |
| $g'$   | GTC/HiPERCAM                   | 2023.09.17  | $p(t^3)$                                   | flare           |
| $r'$   | GTC/HiPERCAM                   | 2023.09.17  | $p(t^3)$                                   | flare           |
| $i'$   | GTC/HiPERCAM                   | 2023.09.17  | $p(t^2) + p(b)$                            |                 |
| $z'$   | GTC/HiPERCAM                   | 2023.09.17  | $p(t^2) + p(x) + p(b)$                     |                 |
| $g'$   | MuSCAT3-2m0                    | 2023.09.19  | $p(t^2)$                                   | 19              |
| $r'$   | MuSCAT3                        | 2023.09.19  | $p(t^2) + p(f^3) + p(a)$                   |                 |
| $i'$   | MuSCAT3                        | 2023.09.19  | $p(t^2) + p(y)$                            |                 |
| $z'$   | MuSCAT3                        | 2023.09.19  | $p(t^2) + p(x)$                            |                 |
| $u'$   | GTC/HiPERCAM                   | 2023.09.17  | $p(t^4)$                                   | flare, 33       |
| $I$    | T150 Sierra Nevada Observatory | 2023.09.20* | $p(t^3)$                                   |                 |
| $I+z$  | SNO-Artemis                    | 2023.09.20* | $p(t^3)$                                   | flare           |
| $I+z$  | SNO-Artemis                    | 2023.09.25* | $p(t^2) + p(y) + p(b)$                     |                 |
| $I+z$  | SNO-Artemis                    | 2023.09.27* | $p(t^2)$                                   |                 |
| $I+z$  | SNO-Artemis                    | 2023.09.30* | $p(t^2) + p(b)$                            |                 |

**Supplementary Information Table 1 | SPECULOOS-3 b transit light curves used in this work.** For each light curve, the selected baseline model is shown as a polynomial  $p()$  of one or several external parameters, with  $t$  = time,  $x$  and  $y$  = x- and y-positions of the stellar image on the detector,  $f$  = full-width at half maximum of the stellar image,  $a$  = airmass, and  $b$  = background. \* not included in the global MCMC analysis. The light curves for which the dates are followed by an asterisk were not used in the global MCMC analyses.

| Filter  | $a$               | $b$                |
|---------|-------------------|--------------------|
| $u'$    | $1.168 \pm 0.086$ | $-0.194 \pm 0.090$ |
| $g'$    | $1.203 \pm 0.066$ | $-0.209 \pm 0.069$ |
| $r'$    | $1.027 \pm 0.012$ | $-0.113 \pm 0.017$ |
| $i'$    | $0.704 \pm 0.094$ | $0.257 \pm 0.085$  |
| $z'$    | $0.438 \pm 0.058$ | $0.450 \pm 0.034$  |
| $I + z$ | $0.57 \pm 0.11$   | $0.354 \pm 0.092$  |
| $Ks$    | $0.149 \pm 0.017$ | $0.373 \pm 0.003$  |

**Supplementary Information Table 2 | SPECULOOS-3 limb-darkening coefficients.** These coefficients were interpolated from the tables of ref. [98]. The means of the values for the  $i'$  and  $z'$  filters were adopted for the non-standard  $I+z$  filter. The errors are the  $1-\sigma$  errors as derived from propagating the  $1-\sigma$  errors on the stellar atmospheric parameters.

| Epoch | Mid-transit timing (BJD <sub>TDB</sub> ) | Telescope(s) + filter(s)                                     |
|-------|------------------------------------------|--------------------------------------------------------------|
| -510  | 2459423.8288 ± 0.0022                    | SAINT-EX, <i>I + z</i>                                       |
| -507  | 2459425.9856 ± 0.0019                    | SAINT-EX, <i>I + z</i>                                       |
| 0     | 2459790.58366 ± 0.00036                  | SNO-Artemis, <i>I + z</i>                                    |
| 499   | 2460149.42662 ± 0.00033                  | SNO-Artemis, <i>I + z</i>                                    |
| 502   | 2460151.58509 ± 0.00049                  | SNO-Artemis, <i>I + z</i>                                    |
| 505   | 2460153.74128 ± 0.00074                  | SNO-Artemis, <i>I + z</i>                                    |
| 506   | 2460154.46060 ± 0.00052                  | SNO-Artemis, <i>I + z</i>                                    |
| 513   | 2460159.49556 ± 0.00054                  | SNO-Artemis, <i>z'</i>                                       |
| 516   | 2460161.65225 ± 0.00086                  | SNO-Artemis, <i>z'</i>                                       |
| 517   | 2460162.37136 ± 0.00060                  | SNO-Artemis, <i>z'</i>                                       |
| 520   | 2460164.52913 ± 0.00080                  | SNO-Artemis, <i>I + z</i>                                    |
| 523   | 2460166.6858 ± 0.0011                    | SNO-Artemis, <i>i'</i>                                       |
| 530   | 2460171.72027 ± 0.00032                  | SNO-Artemis, <i>I + z</i>                                    |
| 531   | 2460172.43941 ± 0.00051                  | SNO-Artemis, <i>i'</i>                                       |
| 541   | 2460179.63018 ± 0.00054                  | SSO-Callisto, <i>z'</i> ; SSO-Europa, <i>i'</i>              |
| 547   | 2460183.94485 ± 0.00091                  | UKIRT/WFCAM, <i>Ks</i>                                       |
| 548   | 2460184.66468 ± 0.00032                  | SSO-Callisto+Io, <i>z'</i><br>SSO-Europa+Ganymede, <i>i'</i> |
| 551   | 2460186.82161 ± 0.00026                  | UKIRT/WFCAM, <i>Ks</i>                                       |
| 566   | 2460197.60841 ± 0.00061                  | SSO-Callisto, <i>I + z</i>                                   |
| 570   | 2460200.48547 ± 0.00076                  | SNO-Artemis, <i>i'</i>                                       |
| 573   | 2460202.64323 ± 0.00097                  | SSO-Io, <i>i'</i>                                            |
| 574   | 2460203.36185 ± 0.00067                  | SNO-Artemis, <i>I + z</i>                                    |
| 576   | 2460204.80016 ± 0.00031                  | MuSCAT3, <i>r', i', z'</i><br>SSO-Io, <i>I + z</i>           |
| 577   | 2460205.519183 ± 0.000066                | GTC/HiPERCAM, <i>g', r', i', z'</i>                          |
| 579   | 2460206.95793 ± 0.00054                  | MuSCAT3, <i>r', i', z'</i>                                   |
| 581   | 2460208.39517 ± 0.00026                  | SNO-Artemis, <i>I + z</i><br>T150 Sierra Nevada <i>I</i>     |
| 588   | 2460213.42988 ± 0.00048                  | SNO-Artemis, <i>I + z</i>                                    |
| 591   | 2460215.5883 ± 0.0012                    | SNO-Artemis, <i>I + z</i>                                    |
| 595   | 2460218.46361 ± 0.00043                  | SNO-Artemis, <i>I + z</i>                                    |

**Supplementary Information Table 3 | SPECULOOS-3 b mid-transit timings.** The values and errors are the mean and standard deviation of the posterior probability distributions derived from an MCMC analysis.
